# Supplementary material for: The synthesis, characterization, DNA/BSA/HSA interactions, molecular modeling, antibacterial properties, and in vitro cytotoxic activities of novel parent and niosome nano-encapsulated Ho(iii) complexes
Source: PubMed Central journal article supplement — RSC Adv. 2020 Jun 16;10(39):22891–908. doi: 10.1039/d0ra03436c (PMC9054688; doi:10.1039/d0ra03436c), 2020-06-16
Supplement: RA-010-D0RA03436C-s001.pdf [file RA-010-D0RA03436C-s001.pdf]

**Synthesis, characterization, DNA/BSA/HSA interactions, molecular modeling, antibacterial and *in vitro* cytotoxic activities of a novel parent and niosome nano-encapsulated Ho(III) complex**

**Deng Yinhua <sup>a,b</sup>, Mohammad Mehdi Foroughi <sup>c</sup>, Zahra Aramesh-Boroujeni <sup>d</sup>, Shohreh Jahani <sup>e,\*</sup>, Mohadesh Peydayesh <sup>f,\*</sup>, Fariba Borhani <sup>g,\*</sup>, Mehrdad Khatami <sup>e,h</sup>, Meysam Rohani <sup>i</sup>, Michal Dusek <sup>j</sup>, Vaclav Eigner <sup>j</sup>**

<sup>a</sup> Department of Pharmacy, Hunan Provincial Peoples Hospital, Changsha 410005, PR. China

<sup>b</sup> Department of Pharmacy, The First Hospital Affiliated to Hunan Normal University, Changsha 410005, PR. China

<sup>c</sup> Department of Chemistry, Kerman Branch, Islamic Azad University, Kerman, Iran

<sup>d</sup> Department of Clinical Laboratory, AlZahra Hospital, Isfahan University of Medical Sciences, Isfahan, Iran

<sup>e</sup> Nanobioelectrochemistry Research Center, Bam University of Medical Sciences, Bam, Iran

<sup>f</sup> Clinical Research Center, Pastor Educational Hospital, Bam University of Medical Sciences, Bam, Iran

<sup>g</sup> Medical Ethics and Law Research Center, Shahid Beheshti University of Medical Sciences, Tehran, Iran

<sup>h</sup> Cell Therapy and Regenerative Medicine Comprehensive Center, Kerman University of Medical Sciences, Kerman, Iran

<sup>i</sup> Department of Medicine, Medical School, Bam University of Medical Sciences, Bam, Iran

<sup>j</sup> Institute of Physics of the Czech Academy of Sciences, Na Slovance 2, 18221 Prague 8, Czech Republic

\*Corresponding Author: Tel.: +98 35331321750

E-mails: [shohre\\_jahani@yahoo.com](mailto:shohre_jahani@yahoo.com), [drpedayesh57@gmail.com](mailto:drpedayesh57@gmail.com), [faribaborhani@msn.com](mailto:faribaborhani@msn.com)

**Table S1.** Selected bond lengths (Å) and angles (°) for [Ho(bpy)(H<sub>2</sub>O)<sub>6</sub>]Cl<sub>3</sub>

| <b>Bond lengths</b> |                |            |                |
|---------------------|----------------|------------|----------------|
| <b>X-Y</b>          | <b>X-Y (Å)</b> | <b>X-Y</b> | <b>X-Y (Å)</b> |
| Ho1-O1w             | 2.317(3)       | Ho2-O7w    | 2.317(3)       |
| Ho1-O2w             | 2.320(3)       | Ho2-O8w    | 2.332(3)       |
| Ho1-O3w             | 2.371(3)       | Ho2-O9w    | 2.377(3)       |
| Ho1-O4w             | 2.326(3)       | Ho2-O10w   | 2.326(3)       |
| Ho1-O5w             | 2.309(3)       | Ho2-O11w   | 2.302(3)       |
| Ho1-O6w             | 2.349(3)       | Ho2-O12w   | 2.375(3)       |
| Ho1-N1a             | 2.492(5)       | Ho2-N1b    | 2.479(5)       |
| Ho1-N2a             | 2.486(5)       | Ho2-N2b    | 2.492(5)       |

  

| <b>Bond angles</b> |                  |               |                  |
|--------------------|------------------|---------------|------------------|
| <b>X-Y-Z</b>       | <b>X-Y-Z (°)</b> | <b>X-Y-Z</b>  | <b>X-Y-Z (°)</b> |
| O1w-Ho1-O2w        | 74.44(12)        | O7w-Ho2-O8w   | 73.60(12)        |
| O1w-Ho1-O3w        | 74.65(13)        | O7w-Ho2-O9w   | 73.39(14)        |
| O1w-Ho1-O4w        | 141.69(13)       | O7w-Ho2-O10w  | 141.25(13)       |
| O1w-Ho1-O5w        | 98.39(12)        | O7w-Ho2-O11w  | 100.68(13)       |
| O1w-Ho1-O6w        | 147.00(13)       | O7w-Ho2-O12w  | 147.03(13)       |
| O1w-Ho1-N1a        | 71.94(13)        | O7w-Ho2-N1b   | 94.01(15)        |
| O1w-Ho1-N2a        | 96.49(14)        | O7w-Ho2-N2b   | 71.26(13)        |
| O2w-Ho1-O3w        | 74.55(12)        | O8w-Ho2-O9w   | 75.29(13)        |
| O2w-Ho1-O4w        | 74.37(11)        | O8w-Ho2-O10w  | 74.52(12)        |
| O2w-Ho1-O6w        | 128.38(12)       | O8w-Ho2-O12w  | 148.19(12)       |
| O2w-Ho1-N1a        | 124.77(13)       | O8w-Ho2-N1b   | 75.44(15)        |
| O3w-Ho1-O4w        | 76.04(12)        | O9w-Ho2-O10w  | 77.69(13)        |
| O4w-Ho1-O5w        | 96.50(11)        | O10w-Ho2-O11w | 94.92(12)        |
| O5w-Ho1-O6w        | 73.58(12)        | O11w-Ho2-O12w | 73.36(11)        |
| O6w-Ho1-N1a        | 75.12(12)        | O12w-Ho2-N1b  | 72.15(13)        |
| N1a-Ho1-N2a        | 65.20(17)        | N1b-Ho2-N2b   | 65.91(17)        |

**Table S2.** Hydrogen-bond geometry (Å, °) for the title compound.

| <b>D–H···A</b>                    | <b>D–H (Å)</b> | <b>H···A (Å)</b> | <b>D···H (Å)</b> | <b>D–H···A (°)</b> |
|-----------------------------------|----------------|------------------|------------------|--------------------|
| O1w–H1o1w···C15 <sup>i</sup>      | 0.82(3)        | 2.53(4)          | 3.096(4)         | 128(4)             |
| O1w–H2o1w···C16 <sup>ii</sup>     | 0.82(3)        | 2.27(3)          | 3.060(4)         | 161(4)             |
| O2w–H1o2w···C12 <sup>i</sup>      | 0.82(3)        | 2.28(3)          | 3.084(4)         | 166(3)             |
| O2w–H2o2w···C13                   | 0.820(15)      | 2.40(2)          | 3.083(4)         | 141(3)             |
| O3w–H1o3w···C16 <sup>iii</sup>    | 0.82(3)        | 2.37(3)          | 3.154(3)         | 161(4)             |
| O3w–H2o3w···C15 <sup>i</sup>      | 0.820(14)      | 2.359(17)        | 3.110(4)         | 153(4)             |
| O4w–H1o4w···C13                   | 0.82(3)        | 2.31(3)          | 3.083(4)         | 157(4)             |
| O4w–H2o4w···C15                   | 0.82(2)        | 2.31(2)          | 3.093(3)         | 161(3)             |
| O5w–H1o5w···C16 <sup>iv</sup>     | 0.82(3)        | 2.34(3)          | 3.122(3)         | 158(3)             |
| O5w–H2o5w···C15 <sup>v</sup>      | 0.82(3)        | 2.25(3)          | 3.047(3)         | 165(3)             |
| O6w–H1o6w···C12                   | 0.82(3)        | 2.27(3)          | 3.074(4)         | 167(3)             |
| O6w–H2o6w···C16 <sup>iv</sup>     | 0.82(3)        | 2.29(3)          | 3.075(4)         | 160(3)             |
| O7w–H1o7w···C14                   | 0.82(3)        | 2.58(4)          | 3.080(4)         | 121(4)             |
| O7w–H2o7w···C11 <sup>vi</sup>     | 0.82(2)        | 2.30(3)          | 3.068(4)         | 157(3)             |
| O8w–H1o8w···C13                   | 0.82(3)        | 2.29(3)          | 3.083(4)         | 161(4)             |
| O8w–H2o8w···C12                   | 0.820(11)      | 2.34(3)          | 3.086(4)         | 152(4)             |
| O9w–H1o9w···C14                   | 0.82(3)        | 2.37(2)          | 3.136(4)         | 155(4)             |
| O9w–H2o9w···C11                   | 0.82(3)        | 2.34(2)          | 3.144(3)         | 167(4)             |
| O10w–H1o10w···C12                 | 0.82(2)        | 2.27(2)          | 3.077(3)         | 166(4)             |
| O10w–H2o10w···C14 <sup>vii</sup>  | 0.82(3)        | 2.27(2)          | 3.072(4)         | 166(3)             |
| O11w–H1o11w···C11 <sup>viii</sup> | 0.82(3)        | 2.31(3)          | 3.105(3)         | 165(3)             |
| O11w–H2o11w···C14 <sup>vi</sup>   | 0.82(3)        | 2.24(3)          | 3.057(3)         | 171(3)             |
| O12w–H2o12w···C13 <sup>vii</sup>  | 0.82(3)        | 2.31(3)          | 3.107(4)         | 165(3)             |
| C3a–H1c3a···C11 <sup>iv</sup>     | 0.96           | 2.95             | 3.593(5)         | 126                |
| C4a–H1c4a···C12 <sup>iv</sup>     | 0.96           | 2.61             | 3.532(5)         | 161                |
| C7a–H1c7a···C12 <sup>iv</sup>     | 0.96           | 2.88             | 3.835(8)         | 177                |
| C9a–H1c9a···C14                   | 0.96           | 2.91             | 3.612(6)         | 131                |
| C2b–H1c2b···C15                   | 0.96           | 2.90             | 3.628(7)         | 133                |
| C3b–H1c3b···C11 <sup>iii</sup>    | 0.96           | 2.92             | 3.879(6)         | 173                |
| C7b–H1c7b···C13 <sup>ix</sup>     | 0.96           | 2.61             | 3.513(5)         | 157                |
| C8b–H1c8b···C16 <sup>vi</sup>     | 0.96           | 2.87             | 3.555(5)         | 129                |
| C10b–H1c10b···C14 <sup>vi</sup>   | 0.96           | 2.93             | 3.888(5)         | 174                |

Symmetry codes: (i) 1+x, y, z; (ii) 2-x, 1-y, -z; (iii) x, 1+y, z; (iv) 1-x, 1-y, -z; (v) 1-x, 2-y, -z; (vi) 1-x, 1-y, 1-z;

(vii) -1+x, y, z; (viii) -x, 1-y, 1-z; (ix) 1-x, 2-y, 1-z.

**Table S3.** Energy transfer efficiency E, overlap integral J, the binding distance to tryptophan residue of protein r and Förster critical distance  $R_0$  upon interaction of Ho(III) complex with BSA and HAS ([BSA]=[Ho(III) complex]=1.58  $\mu$ M, [HSA]=[Ho(III) complex]=2.0  $\mu$ M, T=298 K and  $\lambda_{ex}$ =280 nm).

| <b>Protein</b> | <b>E</b> | <b>J (cm<sup>3</sup> L mol<sup>-1</sup>)<math>\times 10^{-13}</math></b> | <b>R<sub>0</sub> (nm)</b> | <b>r (nm)</b> |
|----------------|----------|--------------------------------------------------------------------------|---------------------------|---------------|
| <b>BSA</b>     | 0.20     | 4.3                                                                      | 2.3                       | 2.7           |
| <b>HSA</b>     | 0.22     | 4.5                                                                      | 2.2                       | 2.7           |

**Table S4.** Binding energies and inhibition constants of investigated complex for DNA, BSA and HSA binding site.

| <b>Macromolecule</b> | <b>Binding Energy (KCal.Mol<sup>-1</sup>)</b> | <b>K<sub>i</sub> (μM)</b> |
|----------------------|-----------------------------------------------|---------------------------|
| <b>DNA</b>           | -5.31                                         | 128.14                    |
| <b>BSA</b>           | -3.67                                         | 596.61                    |
| <b>HSA</b>           | -4.80                                         | 304.65                    |

**Table S5:** The drug concentration causing a 50% reduction in cellular viability (IC<sub>50</sub>) of the Ho(III) complex and NN-En-Ho against of the MCF-7 and A-549 cell lines.

| <b>Cell lines</b> | <b>The drug concentration causing a 50% reduction in cellular viability (IC<sub>50</sub>) (µg/ml)</b> |                  |
|-------------------|-------------------------------------------------------------------------------------------------------|------------------|
|                   | <b>Ho(III) complex</b>                                                                                | <b>NN-En-Ho</b>  |
| <b>MCF-7</b>      | <b>7.23±0.01</b>                                                                                      | <b>4.69±0.02</b> |
| <b>A-549</b>      | <b>11.45±0.03</b>                                                                                     | <b>7.71±0.01</b> |

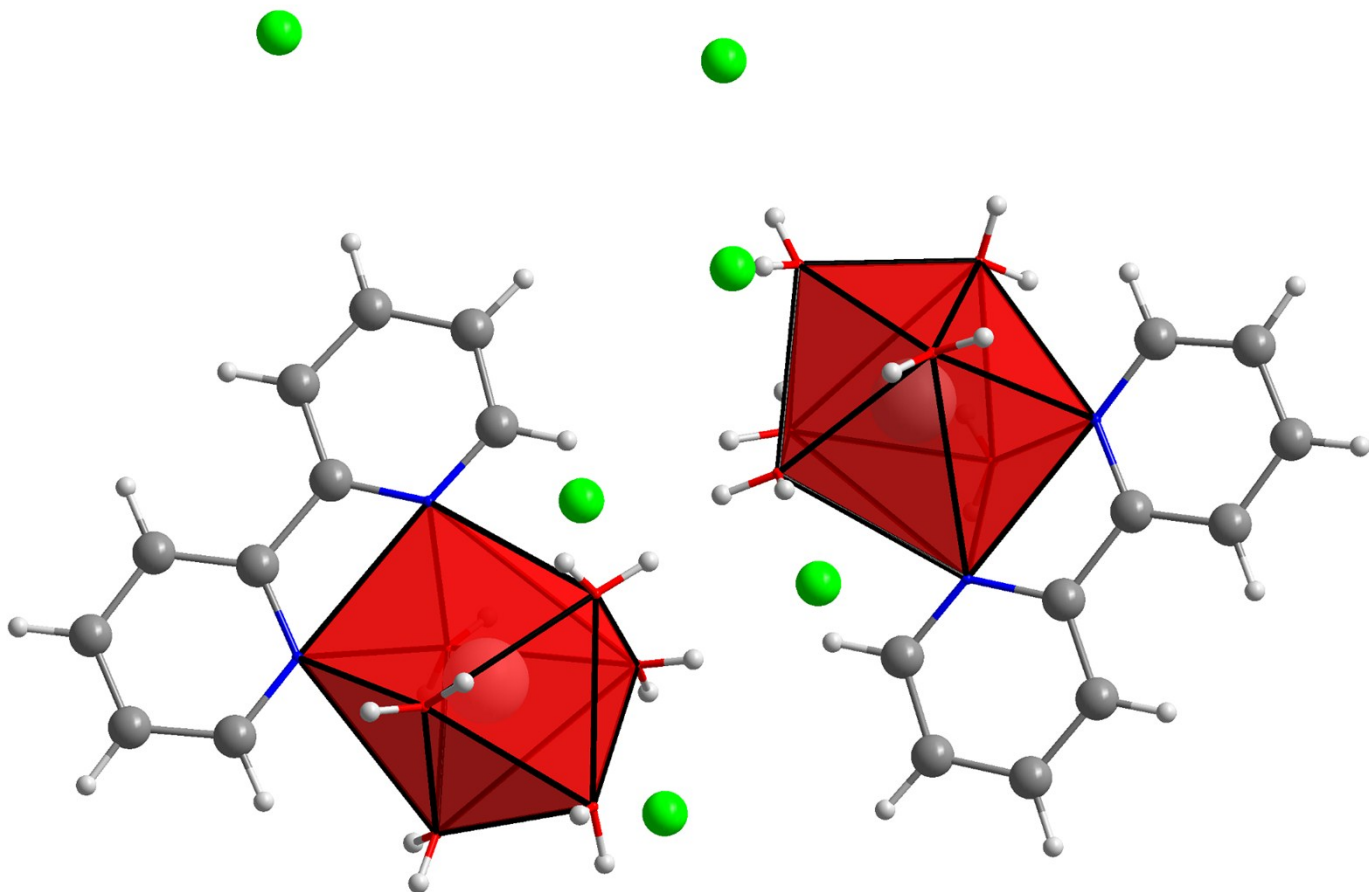

**Figure S1.** A polyhedral representation of  $[\text{Ho}(\text{bpy})(\text{H}_2\text{O})_6]\text{Cl}_3$ .

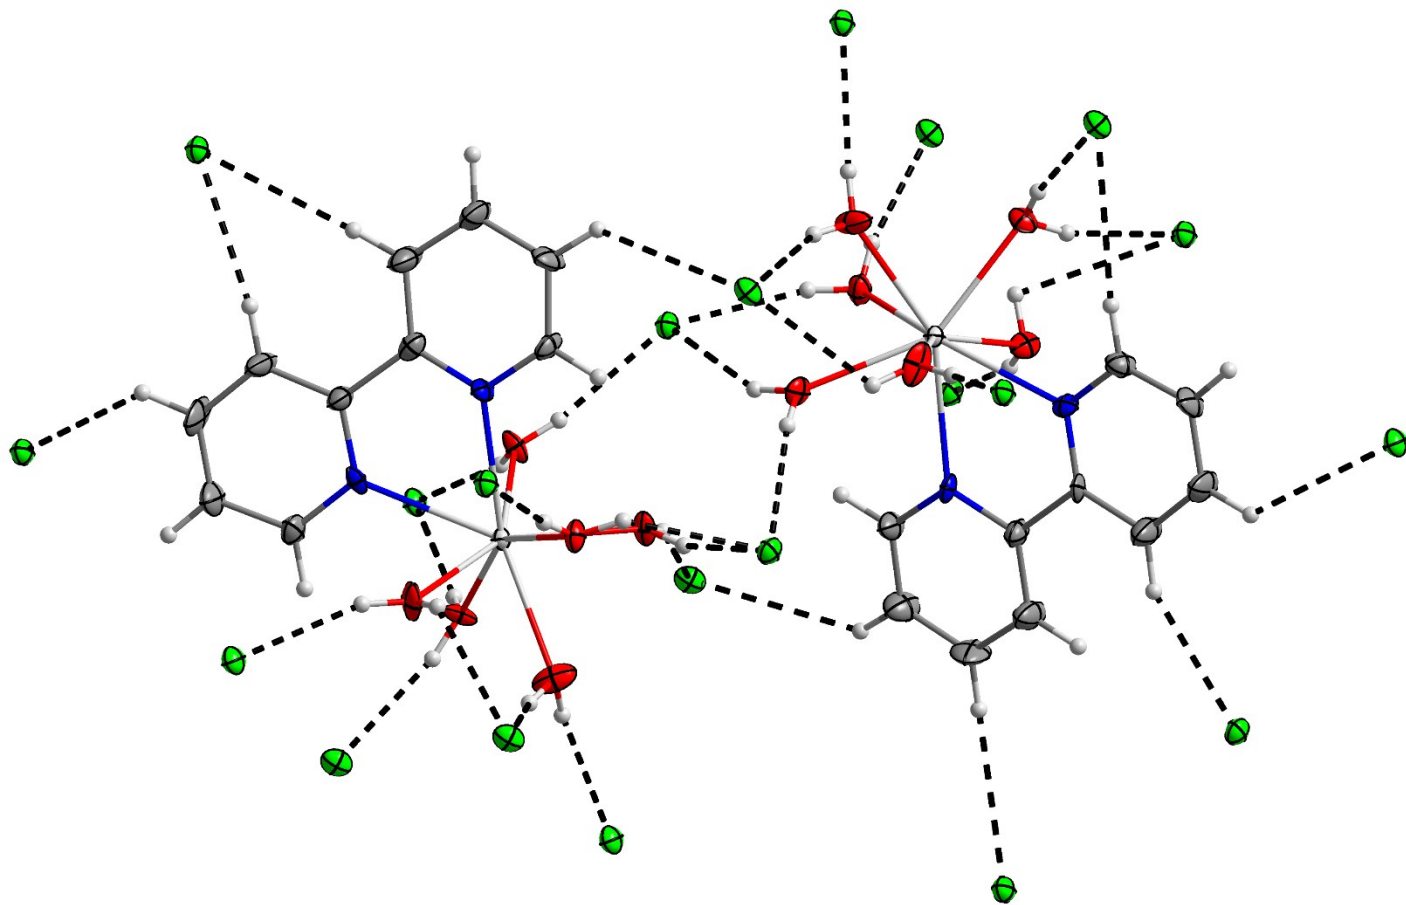

**Figure S2.** Hydrogen bonds in structure [Ho(bpy)(H<sub>2</sub>O)<sub>6</sub>]<sup>3+</sup>Cl<sub>3</sub>.



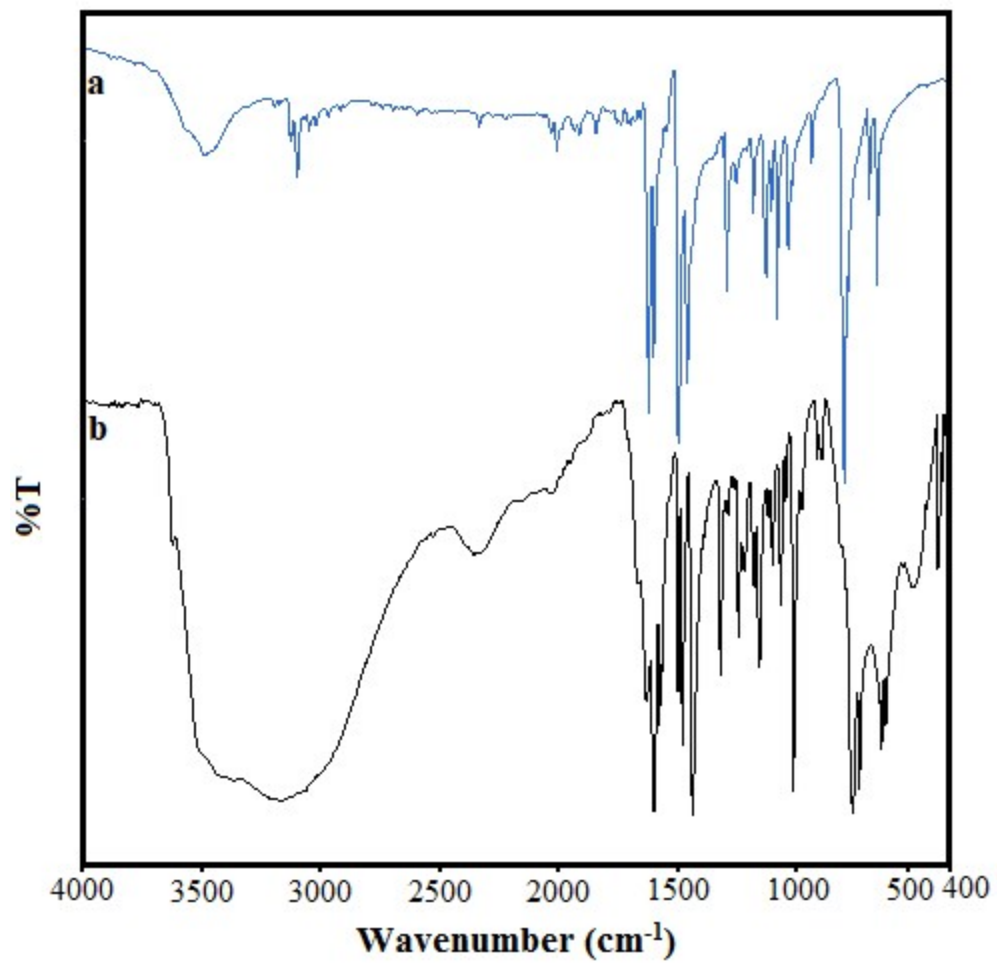

**Figure S3.** FT-IR spectra of a) bpy, b) [Ho(bpy)(H<sub>2</sub>O)<sub>6</sub>]Cl<sub>3</sub> complex.

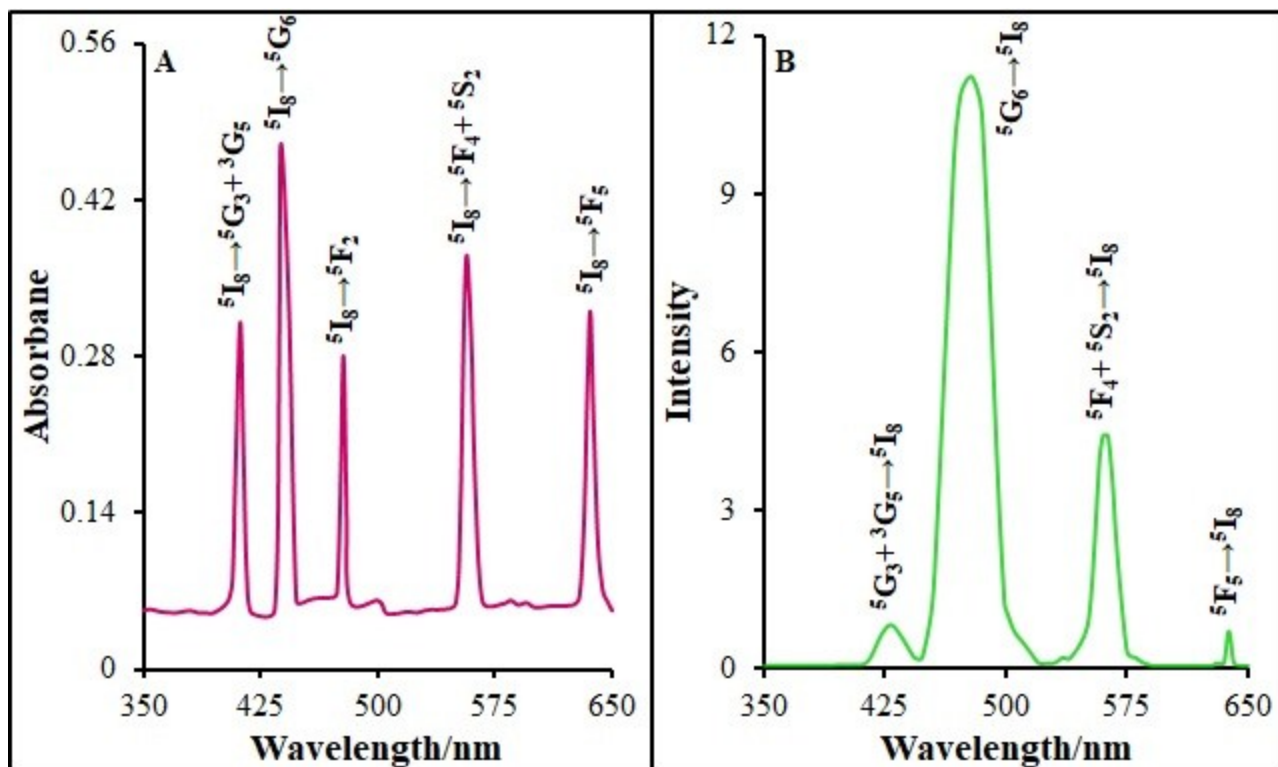

**Figure S4.** (A) The UV-Vis spectra of the Ho(III) complex in methanol. Ho(III) complex Concentration:  $5 \times 10^{-3}$  M. (B) Emission spectrum of Ho(III) complex  $\lambda_{ex} = 280$  nm in methanol at room temperature. Ho(III) complex Concentration:  $5 \times 10^{-3}$  M.

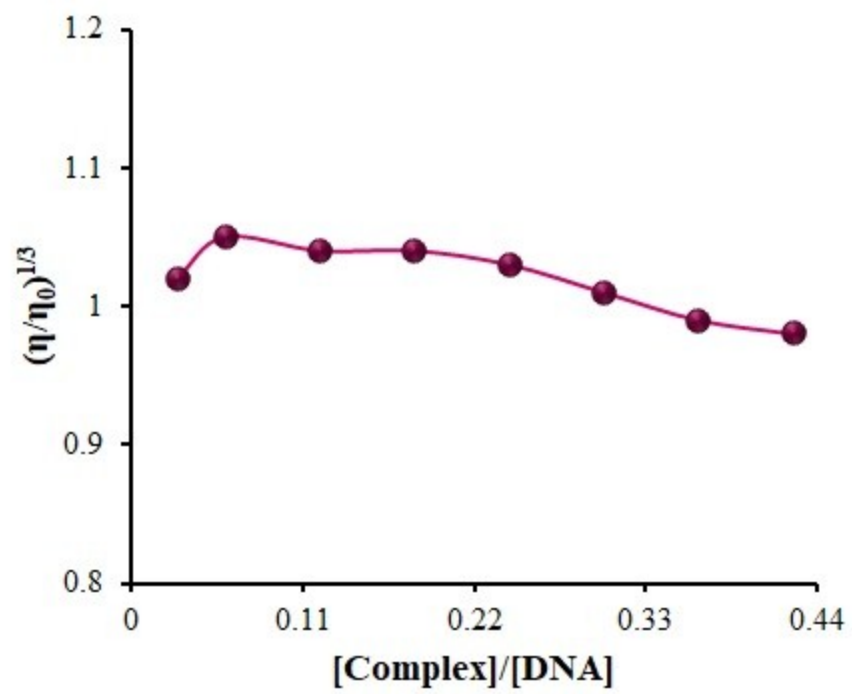

**Figure S5.** Effect of increasing amounts of Ho(III) complex on the viscosity of FS-DNA in the Tris-HCl buffer solution.
